# Supplementary material
Source: Springer Nature journal article supplement (https://www.springermedizin.de/resource/supplementary/12985_2007_357_MOESM5_ESM.pdf/9608058)

### A) Postentry HIV-1 inhibition

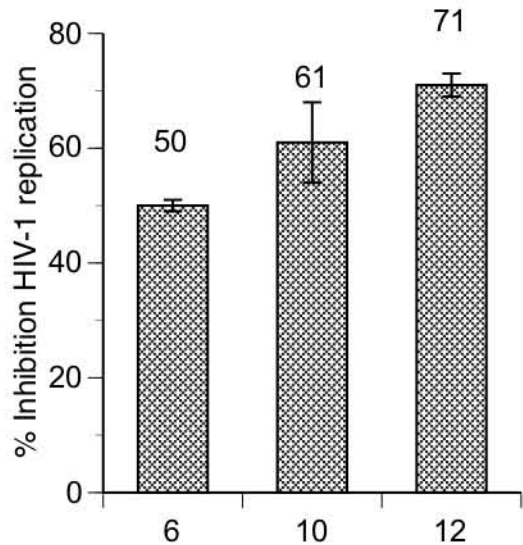

### B) Inhibition of HIV-1 RT

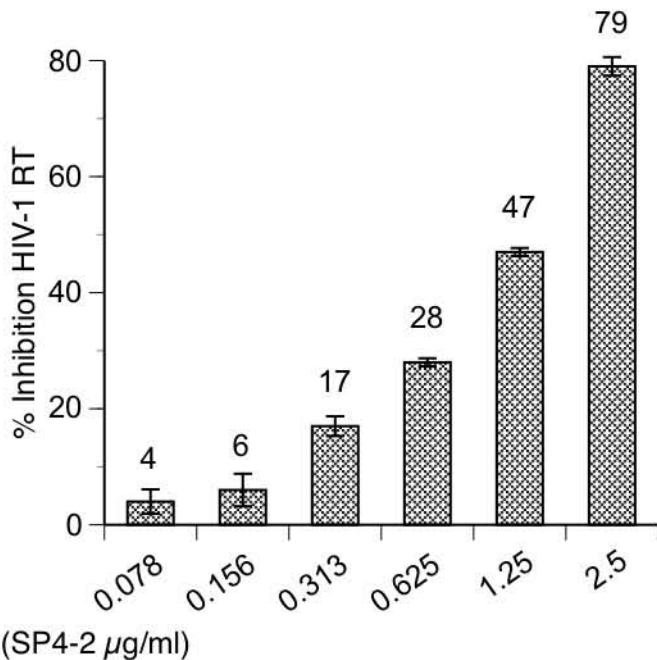

Supplement: MOESM5 [file 9608058]
